# Supplementary material for: Purity Assessment of Dinotefuran Using Mass Balance and Quantitative Nuclear Magnetic Resonance
Source: MDPI journal article supplement (doi:10.3390/molecules28093884), 2023-05-04
Supplement: s1 [file s1]

## **Supplementary Information**

### **Purity assessment of dinotefuran using mass balance and quantitative nuclear magnetic resonance**

Xianjiang Li<sup>1\*</sup>, Wei Zhang<sup>1</sup>, Xiao Li<sup>1</sup>, Shukun Zhou<sup>1</sup>, Mengling Tu<sup>1</sup>,

Yunxiao Zhu<sup>1,2</sup>, Hongmei Li<sup>1</sup>

<sup>1</sup>Key Laboratory of Chemical Metrology and Applications on Nutrition and Health for  
State Market Regulation, Division of Metrology in Chemistry, National Institute of  
Metrology, Beijing 100029, China

<sup>2</sup>State Key Laboratory of Heavy Oil Processing, College of Chemical Engineering and  
Environment, China University of Petroleum, Beijing 102249, PR China

\*Corresponding author: Xianjiang Li, Email: [lixianjiang@nim.ac.cn](mailto:lixianjiang@nim.ac.cn);

Tel: +86-10-64524727, Fax: +86-10-64524783

Address: Division of Metrology in Chemistry, National Institute of Metrology, No. 18  
East Road of North 3<sup>rd</sup> Ring, Chaoyang District, Beijing 100029, China

ORCID: Xianjiang Li (0000-0003-0310-0376)

Wei Zhang (0000-0001-8170-3178)

Xiao Li (0000-0003-1588-1675)

Shukun Zhou (0000-0002-5348-0218)

Mengling Tu (0000-0002-2077-8528)

Yunxiao Zhu (0000-0003-1585-7333)

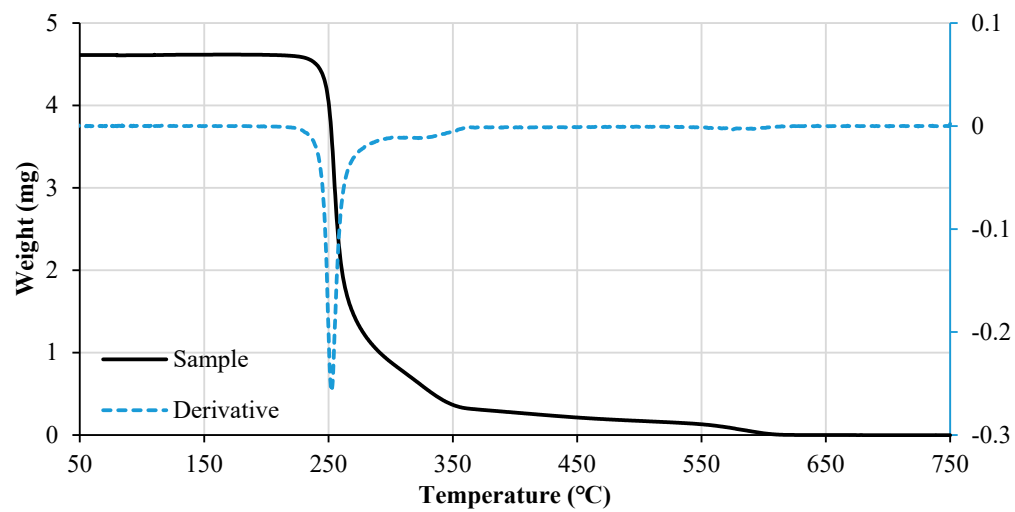

**Figure S1.** TGA curve of DNT

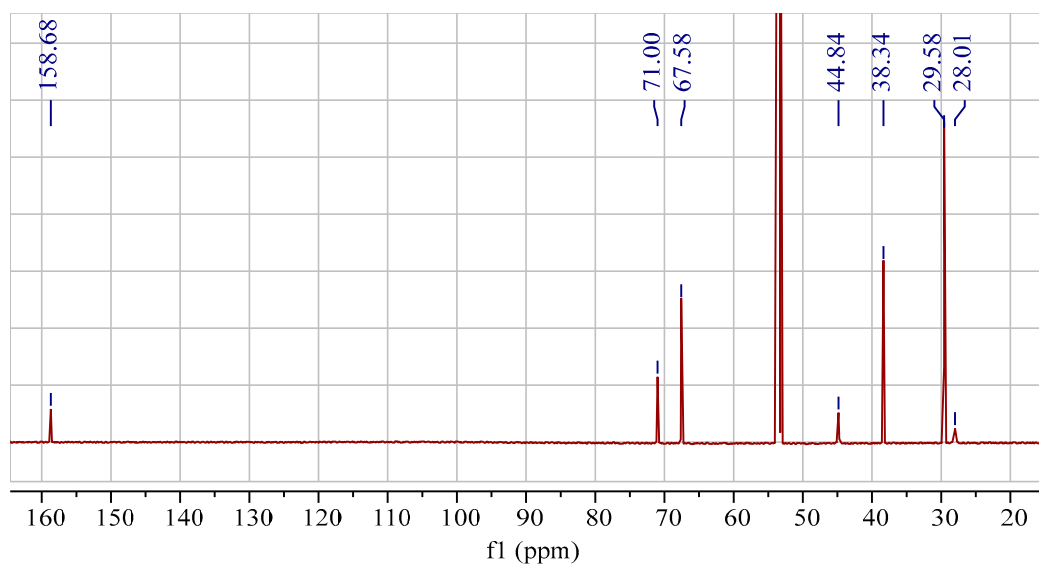

**Figure S2.** <sup>13</sup>C spectrum of DNT

**Table S1.** Uncertainty from the difference in UV response factor.

| Wavelength (nm) | DNT ( $\mu\text{V}\cdot\text{s}$ ) | Impurity 1 ( $\mu\text{V}\cdot\text{s}$ ) | Impurity 2 ( $\mu\text{V}\cdot\text{s}$ ) | Impurity 3( $\mu\text{V}\cdot\text{s}$ ) |
|-----------------|------------------------------------|-------------------------------------------|-------------------------------------------|------------------------------------------|
| 254             | 7040094                            | 2495                                      | 6254                                      | 3598                                     |
| 268             | 9881402                            | 3482                                      | 9339                                      | 5140                                     |
| 269             | 9856533                            | 3250                                      | 9406                                      | 5219                                     |
| 275             | 9072675                            | 2756                                      | 8325                                      | 4983                                     |
| 254             | 7040094                            | 2495                                      | 6254                                      | 3598                                     |
| $u_{2-i}$       | /                                  | 0.0023%                                   | 0.0000%                                   | 0.0000%                                  |
| $u_2$           | 0.0014%                            |                                           |                                           |                                          |

**Table S2** Concentrations of inorganic impurity

| Elements                   | Molecular weight (g/mol) | Concentration (ng/L) | Elements | Molecular weight (g/mol) | Concentration (ng/L) |
|----------------------------|--------------------------|----------------------|----------|--------------------------|----------------------|
| Li                         | 7                        | /                    | In       | 115                      | /                    |
| Be                         | 9                        | /                    | Sn       | 118                      | /                    |
| B                          | 11                       | /                    | Sb       | 121                      | /                    |
| Na                         | 23                       | /                    | Te       | 125                      | /                    |
| Mg                         | 24                       | /                    | I        | 127                      | /                    |
| Al                         | 27                       | /                    | Cs       | 133                      | 0.01                 |
| Si                         | 28                       | /                    | Ba       | 137                      | 37.48                |
| K                          | 39                       | /                    | La       | 139                      | /                    |
| Ca                         | 44                       | /                    | Ce       | 140                      | /                    |
| Sc                         | 45                       | /                    | Pr       | 141                      | /                    |
| Ti                         | 47                       | /                    | Nd       | 146                      | /                    |
| V                          | 51                       | 0.02                 | Sm       | 147                      | /                    |
| Cr                         | 53                       | /                    | Eu       | 153                      | /                    |
| Mn                         | 55                       | 0.05                 | Gd       | 157                      | /                    |
| Fe                         | 57                       | /                    | Tb       | 159                      | /                    |
| Co                         | 59                       | /                    | Dy       | 163                      | /                    |
| Ni                         | 60                       | /                    | Ho       | 165                      | /                    |
| Cu                         | 63                       | 0.04                 | Er       | 166                      | /                    |
| Zn                         | 66                       | /                    | Tm       | 169                      | /                    |
| Ga                         | 69                       | 1.99                 | Yb       | 172                      | /                    |
| Ge                         | 72                       | /                    | Lu       | 175                      | /                    |
| As                         | 75                       | /                    | Hf       | 178                      | /                    |
| Se                         | 82                       | /                    | Ta       | 181                      | /                    |
| Br                         | 79                       | /                    | W        | 182                      | /                    |
| Rb                         | 85                       | /                    | Re       | 185                      | /                    |
| Sr                         | 88                       | /                    | Os       | 189                      | /                    |
| Y                          | 89                       | /                    | Ir       | 193                      | /                    |
| Zr                         | 90                       | /                    | Pt       | 195                      | /                    |
| Nb                         | 93                       | 0.01                 | Au       | 197                      | /                    |
| Mo                         | 95                       | /                    | Hg       | 202                      | /                    |
| Ru                         | 101                      | /                    | Tl       | 205                      | /                    |
| Rh                         | 103                      | 0.19                 | Pb       | 208                      | /                    |
| Pd                         | 105                      | /                    | Bi       | 209                      | /                    |
| Ag                         | 107                      | /                    | Th       | 232                      | /                    |
| Cd                         | 111                      | /                    | U        | 238                      | /                    |
| Total concentration (ng/L) |                          |                      | 39.8     |                          |                      |
| DNT concentration (ng/L)   |                          |                      | 4228000  |                          |                      |
| Inorganic impurity (mg/g)  |                          |                      | 0.01     |                          |                      |
